# Supplementary material for: Pulmonary Hypertension Associated Genetic Variants in Sarcoidosis Associated Pulmonary Hypertension
Source: MDPI journal article supplement (doi:10.3390/diagnostics12102564), 2022-10-21
Supplement: s1 [file s1]

## **SUPPLEMENTAL INFORMATION**

### **Pulmonary hypertension associated genetic variants in sarcoidosis associated pulmonary hypertension**

#### **Supplemental Information S1. Methods**

##### **Variant filtering**

Variant call files were uploaded into QIAGEN Clinical Insight Interpret Translational (QCI; Qiagen) software for filtering. Only variants were kept with a call quality of  $\geq 20$ , read depth  $\geq 10$ , genotype quality  $\geq 30$  and allele fraction  $\geq 25$  in any case or in any control. Variants observed with an allele frequency of at least 1 in 100 in gnomAD were excluded. Only variants no more than 20 bases into an intron were kept. Variants were filtered on predicted deleteriousness whereby variants were included if 1) they are listed in HGMD; or 2) if they are pathogenic, likely pathogenic or of uncertain significance according to computed ACMG classification guidelines; or 3) if they are associated with loss of function of a gene by causing a frameshift, in-frame indel, or start/stop codon change, a missense variant, or lead to splice site loss up to 2 bases into intron as predicted by MaxEntScan. Any remaining variants with a Combined Annotation-Dependent Depletion (CADD v1.6) score  $< 15$  were excluded.

Additional predictions of variant pathogenicity by the PolyPhen-2 (v2.2.2[19]), SIFT (BSIFT 2016-02-23)[18], Mutation Assessor (release 3)[21] and Mutation Taster2021[20] software are displayed for information but were not used as filtering criteria. These tools predict the effect of variants based on evolutionary conservation and the effect on protein structure and function. CADD, SIFT and PolyPhen-2 predictions are incorporated in the QCI software, whereas Mutation Assessor and MutationTaster2021 were accessed through their web-based software. CADD integrates various different annotations into one Phred-based score of deleteriousness for single nucleotide variants (SNVs) and indels[17]. Predicted variant classification according to American College of Medical Genetics and Genomics (ACMG) 2015 guidelines[22] was also extracted from QCI software.

Variants resulting from probable sequencing artefacts were excluded by means of visual inspection of the raw BAM file in IGV v2.8. Three variants were excluded from further analysis after visual examination in IGV (all deletions or insertions in a series of trinucleotide repeats in the *BMPT2* 5'UTR region)

##### **Clinical gene panel for P(A)H**

The clinical panel was composed based on the information from the Pulmonary Arterial Hypertension of Genomics England PanelApp version 2.16[14]. It consists of seven genes that were rated as diagnostic level of evidence (listed as 'Green') on the Pulmonary Arterial Hypertension of Genomics England PanelApp version 2.16 (i.e. *ACVRL1*, *ATP13A3*, *BMPT2*, *EIF2AK4*, *ENG*, *GDF2*, *KCNK3*, *SMAD9*, *SOX17*, *TBX4*). Additionally, two genes listed as 'Amber' (evidence for gene-disease association is moderate) were included because Expert reviews state there is now sufficient evidence to classify the genes as 'Green' (*ABCC8* and *KDR*)[14]. *KCNA5* did not meet above-mentioned criteria but was included because a potentially pathogenic mutation in this gene was previously identified in a patient with sarcoidosis and PH[13].

##### **Biologically relevant genes with variants in $\geq 15\%$ of SAPH patients**

Initial filtering steps were the same as the clinical panel, with the exception of the clinical panel itself. Instead, several steps were taken in QCI to yield a list of genes in which at least six SAPH patients carry a variant and a maximum of two SA patients. First, the Biological Context tool in the QCI software was used to select variants in 572 genes that are implicated in pulmonary hypertension disease (see SI.1 for

list of genes). From this list of genes, a list was created of genes in which at least three SA patients carry a variant. This was done with the Genetic Analysis tool that can select genes with a (homo-, hetero-, or hemizygous, or het-ambiguous) variant in at least three SA patients on the gene level. To yield the genes of interest, after initial filtering 1) only variants in 572 PH-associated genes were selected (Biological Context tool); 2) genes with three or more variant carriers among SA patients were excluded (by uploading the previously created list in a second Biological Context tool); and 3) genes in which at least 6 SAPH patients carry a (homo-, hetero-, or hemizygous, or het-ambiguous) variant on the gene level were selected using the Genetic Analysis tool. The remaining genes are the genes of interest with variants in  $\geq 15\%$  of SAPH patients and maximally two of the SA patients. The complete list of variants is then obtained by 1) initial filtering; 2) selecting variants in 572 PH-associated genes (Biological Context tool); and 3) selecting the genes of interest in a separate Biological Context tool).

# 572 genes implicated in pulmonary hypertension according to QCI software

|          |         |         |         |         |              |
|----------|---------|---------|---------|---------|--------------|
| A4GNT    | BBS4    | CHD7    | DHX38   | FLT1    | GUCY2D       |
| ABCA3    | BBS5    | CHID1   | DNAAF2  | FLT4    | GUCY2F       |
| ABCC1    | BBS7    | CHRNA1  | DNAH5   | FOSL2   | GZMB         |
| ABCC8    | BCL2L1  | CHRNA10 | DNMT3A  | FOXC2   | H1-2         |
| ABCC9    | BICC1   | CHRNA2  | DOCK6   | FOXD3   | HBB          |
| ABL1     | BIRC5   | CHRNA3  | DRC1    | FOXF1   | HBP1         |
| ACTA2    | BMP10   | CHRNA4  | DYNC2H1 | FOXO1   | HGF          |
| ACTC1    | BMP2    | CHRNA5  | DYNC2I1 | FREM2   | HIRA         |
| ACVR2B   | BMP4    | CHRNA6  | DYNC2I2 | FRZB    | HLA-DQA1     |
| ACVRL1   | BMP8A   | CHRNA7  | ECE1    | FTSJ3   | HLA-DQB1     |
| ADA      | BMPR1A  | CHRNA9  | EDN1    | G6PC3   | HLA-DRB1     |
| ADAMTS1  | BMPR1B  | CHRNA1  | EDNRA   | GAB1    | HLA-DRB5     |
| ADAMTS18 | BMPR2   | CHRNA2  | EDNRB   | GABRA1  | HRG          |
| ADAMTS6  | BRAP    | CHRNA3  | EFTUD2  | GABRA2  | HTR2A        |
| ADORA2A  | BRME1   | CHRNA4  | EGFR    | GABRA3  | HTR2B        |
| ADORA2B  | BROX    | CHRNA5  | EGLN1   | GABRA4  | IFNA1/IFNA13 |
| ADRA2A   | BRWD3   | CHRNA6  | EID1    | GABRA5  | IFNA10       |
| ADRA2B   | C3orf18 | CHRNA7  | EIF2AK4 | GABRA6  | IFNA14       |
| ADRA2C   | C7orf31 | CHRNA8  | ELL     | GABRB1  | IFNA16       |
| ADRB1    | C9      | CHRNA9  | ELN     | GABRB2  | IFNA17       |
| ADRB2    | CA1     | CHRNA10 | EMC8    | GABRB3  | IFNA2        |
| AFF2     | CA10    | CHRNA11 | EMID1   | GABRD   | IFNA21       |
| AGT      | CA11    | CHRNA12 | ENG     | GABRE   | IFNA4        |
| AGTR1    | CA12    | CHRNA13 | ENPP6   | GABRG1  | IFNA5        |
| AGTR2    | CA13    | CHRNA14 | EOGT    | GABRG2  | IFNA6        |
| AHR      | CA14    | CNTN4   | EP300   | GABRG3  | IFNA7        |
| ALDH9A1  | CA2     | CNTRL   | EPAS1   | GABRP   | IFNA8        |
| ALG3     | CA3     | COL18A1 | EPC1    | GAMT    | IFNAR1       |
| ALPG     | CA4     | COL1A2  | EPHB4   | GDE1    | IFNB1        |
| ALS2     | CA5A    | COL27A1 | ERG     | GDF2    | IFNE         |
| AMOT     | CA5B    | COL2A1  | ESRRA   | GDPD1   | IFNG         |
| ANGPT1   | CA6     | COL3A1  | EXOC6B  | GDPD3   | IFNK         |
| ANK3     | CA7     | COL5A1  | EZH1    | GDPD4   | IFNW1        |
| APEX1    | CA8     | COL5A2  | F2      | GGCX    | IFT140       |
| APOE     | CA9     | CPLANE1 | F5      | GIPC2   | IL12B        |
| AQP1     | CACNA1C | CPS1    | F8      | GLRA1   | IL18         |
| AR       | CARNS1  | CRACR2A | FA2H    | GLRA2   | IL1R1        |
| ARG1     | CAV1    | CREBBP  | FAM149A | GLRA3   | IL1RN        |
| ARG2     | CBLN2   | CSF1R   | FARSA   | GLRA4   | IMMT         |
| ASH2L    | CCDC39  | CSF2    | FBLN2   | GLRB    | INHBA        |
| ASS1     | CCDC40  | CSF2RA  | FBN1    | GPR174  | INHBB        |
| ATF6     | CCDC50  | CSNK2A2 | FBN2    | GPSM2   | INHBC        |
| ATG10    | CCL2    | CX3CL1  | FCN2    | GRHL2   | INHBE        |
| ATP13A3  | CCR7    | CXCR4   | FGA     | GRIA1   | INVS         |
| ATP2C1   | CCRL2   | DAB2    | FGB     | GRM8    | ITGAM        |
| ATP6V0A2 | CD22    | DBF4B   | FGF12   | GUCY1A1 | ITPR1        |
| BAZ1B    | CD248   | DCAF12  | FHL1    | GUCY1A2 | ITPR3        |
| BBS10    | CFTR    | DDR1    | FICD    | GUCY1B1 | ITSN1        |
| BBS2     | CHD4    | DDR2    | FLNA    | GUCY2C  | JAG1         |

|          |         |          |          |           |         |
|----------|---------|----------|----------|-----------|---------|
| KCNA5    | MRTFA   | PDE12    | PRICKLE1 | SMAD6     | TOPBP1  |
| KCNH2    | MSH2    | PDE1A    | PRKG1    | SMAD7     | TOR1B   |
| KCNK3    | MST1    | PDE1B    | PRMT2    | SMAD9     | TRH     |
| KDM3B    | MTHFR   | PDE1C    | PSMC4    | SMARCA2   | TRPC1   |
| KDR      | MUC5B   | PDE2A    | PTGDR2   | SMARCA4   | TRPC6   |
| KEAP1    | MYH2    | PDE3A    | PTGER1   | SMARCAL1  | TSC1    |
| KIAA2026 | MYH6    | PDE3B    | PTGIR    | SMPDL3A   | TSC2    |
| KIF21A   | MYO16   | PDE4A    | PTGIS    | SMPDL3B   | TSHZ1   |
| KIF24    | MYO5C   | PDE4B    | PTPN11   | SMS       | TTLL3   |
| KIF7     | NAPEPLD | PDE4C    | PTPN14   | SMYD4     | TUBB6   |
| KIT      | NCK1    | PDE4D    | RAB23    | SOD1      | TULP2   |
| KLB      | NDST1   | PDE5A    | RAF1     | SOX17     | VANGL1  |
| KLF2     | NEK1    | PDE6A    | RAI1     | SPATC1    | VCAN    |
| KLK1     | NEK8    | PDE6B    | RARS2    | SPTA1     | VCL     |
| KMT2D    | NEU1    | PDE6C    | RASA2    | SRC       | VHL     |
| L1CAM    | NF1     | PDE6D    | RBL2     | SS18      | VIM     |
| LAMA1    | NFKBIA  | PDE6G    | RET      | TAF13     | VIP     |
| LAMA4    | NIPBL   | PDE6H    | REV3L    | TBC1D10B  | WDFY4   |
| LAMC1    | NKX2-5  | PDE7A    | RNF213   | TBX20     | WDR5    |
| LIFR     | NKX2-6  | PDE7B    | ROBO1    | TBX4      | WNK1    |
| LIN7A    | NOB1    | PDE8A    | ROBO2    | TCN2      | WNT1    |
| LIPH     | NOS2    | PDE8B    | ROR2     | TDP2      | WRN     |
| LLGL1    | NOS3    | PDE9A    | RPTOR    | TEK       | ZADH2   |
| LOXL3    | NOTCH1  | PDGFD    | RYR2     | TET2      | ZMYM2   |
| LRP1     | NOTCH2  | PDGFRA   | S100A1   | TF        | ZNF146  |
| LRP2     | NOTCH3  | PDGFRB   | SAMHD1   | TGFB1     | ZNF280B |
| LTBP1    | NOX4    | PEX1     | SARS2    | TGFB1     | ZNF620  |
| LZTR1    | NPPA    | PEX13    | SCAF11   | THBD      | ZSWIM9  |
| MAP2K1   | NPPB    | PFKFB3   | SCN10A   | THBS1     |         |
| MAP4     | NPR1    | PGS1     | SCN1A    | THSD7A    |         |
| MAPK6    | NPR2    | PHF12    | SCN1B    | THYN1     |         |
| MAT2A    | NPR3    | PHF20L1  | SCN5A    | TM4SF20   |         |
| MBTPS1   | NR3C2   | PIM1     | SCN9A    | TMEM67    |         |
| MCAM     | NSD1    | PITX2    | SEC23IP  | TMEM70    |         |
| MCM3AP   | NSDHL   | PLA2G2D  | SELP     | TNC       |         |
| MEFV     | NSMAF   | PLAG1    | SEMA6D   | TNF       |         |
| MEIS1    | NUCB1   | PLAT     | SERPINE1 | TNFAIP3   |         |
| MESD     | NUDCD1  | PLD6     | SH3TC2   | TNFAIP6   |         |
| MIF      | NVL     | PLG      | SHH      | TNFRSF13B |         |
| MIR204   | OPA3    | PLOD1    | SIRT3    | TNFSF10   |         |
| MIR21    | OPLAH   | POLG     | SLC25A24 | TNFSF4    |         |
| MIR424   | OR2T34  | POU5F1   | SLC2A1   | TNNC1     |         |
| MIR503   | OSGEPL1 | PPARD    | SLC2A10  | TNNC2     |         |
| MKKS     | OTC     | PPIA     | SLC2A4   | TNNI1     |         |
| MMACHC   | P2RY12  | PPL      | SLC6A17  | TNNI2     |         |
| MME      | PCARE   | PPP1R13L | SLC6A4   | TNNI3     |         |
| MMP21    | PCOLCE2 | PPP2R3A  | SLC8A1   | TNNT1     |         |
| MN1      | PDCD4   | PRDM1    | SLC9A1   | TNNT2     |         |
| MPPE1    | PDE10A  | PRDM9    | SMAD1    | TNNT3     |         |
| MPPED2   | PDE11A  | PREX1    | SMAD4    | TOP1      |         |

## SUPPLEMENTAL DATA

**Supplemental Table S1 Baseline characteristics of SAPH patients with a variant in diagnostic gene panel compared to SAPH patients without a variant**

|                                                                 |                  | SAPH – no<br>variant in<br>diagnostic gene<br>panel (n=25) | SAPH – with<br>variant in<br>diagnostic gene<br>panel (n=14) | p-value |
|-----------------------------------------------------------------|------------------|------------------------------------------------------------|--------------------------------------------------------------|---------|
| <b>Male, n (%)</b>                                              |                  | 12 (48.0)                                                  | 7 (50.0)                                                     | 0.90    |
| <b>Age mean (SD), y<br/>(n=25; n=13)</b>                        |                  | 59.9 (10.4)                                                | 59.7 (11.9)                                                  | 0.96    |
| <b>Ancestry %</b>                                               | White, n (%)     | 14 (56.0)                                                  | 13 (92.9)                                                    | 0.018   |
|                                                                 | Black, n (%)     | 9 (36.0)                                                   | 0 (0.0)                                                      |         |
|                                                                 | Hindustan, n (%) | 2 (8.0)                                                    | 1 (7.1)                                                      |         |
| <b>Scadding stage<br/>(n=24; n=14)</b>                          | 0, n (%)         | 2 (8.3)                                                    | 0 (0.0)                                                      | 0.55    |
|                                                                 | 1, n (%)         | 3 (12.5)                                                   | 1 (7.1)                                                      |         |
|                                                                 | 2, n (%)         | 1 (4.2)                                                    | 3 (21.4)                                                     |         |
|                                                                 | 3, n (%)         | 1 (4.2)                                                    | 1 (7.1)                                                      |         |
|                                                                 | 4, n (%)         | 17 (70.8)                                                  | 9 (64.3)                                                     |         |
| <b>Lung fibrosis score</b>                                      | < 5%, n (%)      | 5 (20.8)                                                   | 4 (28.6)                                                     | 0.50    |
|                                                                 | 5-20%, n (%)     | 0 (0.0)                                                    | 1 (7.1)                                                      |         |
|                                                                 | >20%, n (%)      | 19 (79.2)                                                  | 9 (64.3)                                                     |         |
| <b>FVC % predicted,<br/>mean (SD) (n=24;<br/>n=13)</b>          |                  | 65.3 (19.1)                                                | 69.0 (20.6)                                                  | 0.22    |
| <b>DLCO SB% predicted,<br/>mean, mean (SD)<br/>(n=20; n=12)</b> |                  | 49.0 (17.4)                                                | 45.8 (20.8)                                                  | 0.64    |
| <b>Mean PAP mmHg,<br/>mean (SD)</b>                             |                  | 38.3 (11.6)                                                | 36.0 (9.8)                                                   | 0.59    |
| <b>PVR Wood units,<br/>mean (SD) (n=24;<br/>n=12)</b>           |                  | 6.0 (3.3)                                                  | 4.8 (2.5)                                                    | 0.56    |
| <b>Cardiac output L·min-<br/>1, mean (SD) (n=25;<br/>n=13)</b>  |                  | 5.8 (2.0)                                                  | 5.6 (1.3)                                                    | 0.88    |
| <b>PCWP mmHg, mean<br/>(SD) (n=24; n=13)</b>                    |                  | 9.9 (3.8)                                                  | 9.4 (3.5)                                                    | 0.65    |

Comparison of baseline statistics between patients of the SAPH group where a variant in the diagnostic gene panel was identified (n=14) compared to patients without such a variant (n=25).

**Supplemental Table S2 Baseline characteristics of SA patients with a variant in diagnostic gene panel compared to SA patients without a variant**

|                                                                |                      | <b>SA – no variant<br/>in diagnostic<br/>gene panel<br/>(n=34)</b> | <b>SA – with variant<br/>in diagnostic<br/>gene panel (n=5)</b> | <b>p-value</b> |
|----------------------------------------------------------------|----------------------|--------------------------------------------------------------------|-----------------------------------------------------------------|----------------|
| <b>Male, n (%)</b>                                             |                      | 18 (52.9)                                                          | 1 (20.0)                                                        | 0.34           |
| <b>Age mean (SD), y</b>                                        |                      | 61.4 (11.1)                                                        | 57.7 (9.6)                                                      | 0.47           |
| <b>Ancestry %</b>                                              | White, n (%)         | 24 (70.6)                                                          | 3 (60.0)                                                        | 0.40           |
|                                                                | Black, n (%)         | 8 (23.5)                                                           | 1 (20.0)                                                        |                |
|                                                                | Hindustan, n (%)     | 2 (5.9)                                                            | 1 (20.0)                                                        |                |
|                                                                | United States, n (%) | -                                                                  | -                                                               |                |
| <b>Scadding stage</b>                                          | 0, n (%)             | 7 (20.6)                                                           | 1 (20.0)                                                        | 1.00           |
|                                                                | 1, n (%)             | 3 (8.8)                                                            | 0 (0.0)                                                         |                |
|                                                                | 2, n (%)             | 8 (23.5)                                                           | 1 (20.0)                                                        |                |
|                                                                | 3, n (%)             | 5 (14.7)                                                           | 1 (20.0)                                                        |                |
|                                                                | 4, n (%)             | 11 (32.4)                                                          | 2 (40.0)                                                        |                |
| <b>Lung fibrosis score</b>                                     | < 5%, n (%)          | 19 (55.9)                                                          | 3 (60.0)                                                        | 0.89           |
|                                                                | 5-20%, n (%)         | 7 (20.6)                                                           | 0 (0.0)                                                         |                |
|                                                                | >20%, n (%)          | 8 (23.5)                                                           | 2 (40.0)                                                        |                |
| <b>FVC % predicted,<br/>mean (SD) (n=31; n=5)</b>              |                      | 96.7 (21.8)                                                        | 79.1 (27.7)                                                     | 0.32           |
| <b>DLCO SB% predicted,<br/>mean, mean (SD)<br/>(n=28; n=4)</b> |                      | 69.3 (15.9)                                                        | 62.3 (7.7)                                                      | 0.25           |

Comparison of baseline statistics between subjects of the SA group where a variant in the diagnostic panel was identified (n=5) compared to subjects without such variant (n=34). Hemodynamics are not available for this group. \*All subjects in this group were from the Dutch cohort

**Supplemental Table S3 Overview of rare variants in biologically relevant genes in which ≥15% of the SA patients carry a rare variant**

| Gene  | Transcript     | Nucleotide change | Amino acid change | dbSNP        | gnomAD frequency | CADD | SIFT     | PPh2       | Mutation Taster | Mutation Assessor |
|-------|----------------|-------------------|-------------------|--------------|------------------|------|----------|------------|-----------------|-------------------|
| PDE4A | NM_001111307.2 | c.-129C>T         |                   | rs879405688  | 0.0004           | 18.4 | -        | -          | B               | -                 |
| PDE4A | NM_001111309.1 | c.388G>A          | p.(V130I)         | rs1234243707 | 0.0000           | 23.3 | <u>D</u> | <u>PoD</u> | B               | <u>M</u>          |
| PDE4A | NM_006202.3    | c.487C>T          | p.(R163W)         | rs144901748  | 0.0001           | 28.6 | <u>D</u> | <u>PrD</u> | <u>D</u>        | <u>M</u>          |
| PDE4A | NM_006202.3    | c.748+1G>T        |                   |              | -                | 34.0 | -        | -          | <u>D</u>        | -                 |
| PDE4A | NM_006202.3    | c.871C>T          | p.(R291W)         | rs146986676  | 0.0006           | 25.6 | T        | <u>PoD</u> | B               | L                 |
| PDE4A | NM_006202.3    | c.883C>T          | p.(R295C)         | rs951423867  | -                | 31.0 | <u>D</u> | <u>PrD</u> | B*              | <u>H</u>          |
| PDE4A | NM_006202.3    | c.1018C>T         | p.(R340C)         | rs200220469  | -                | 31.0 | <u>D</u> | <u>PrD</u> | B**             | <u>H</u>          |
| PDE4A | NM_006202.3    | c.1357G>A         | p.(E453K)         | rs139163380  | 0.0001           | 23.1 | T        | <u>PoD</u> | B               | L                 |

a) SIFT: T= Tolerated; D = Damaging; A = Activating; b) PolyPhen-2: B= Benign; PrD = Probably Damaging; PoD = Possibly Damaging; c) Mutation Taster: D=Deleterious; B=Benign; d) Mutation Assessor functional impact: N= Neutral; L= Low; M= Medium; H= High; Predicted functional impact high or medium is predicted functional, low or neutral is predicted non-functional. Predictions by SIFT, PolyPhen-2, Mutation Taster or Mutation Assessor indicating deleterious consequences are underlined. \* but predicted D in all other transcripts; \*\* but predicted D in most other transcripts
